# Supplementary figures and images for: Silver chemical vapor generation for atomic absorption spectrometry: minimization of transport losses, interferences and application to water analysis
Source: Royal Society of Chemistry journal article supplement (doi:10.1039/c0ja00018c), 2010-01-01

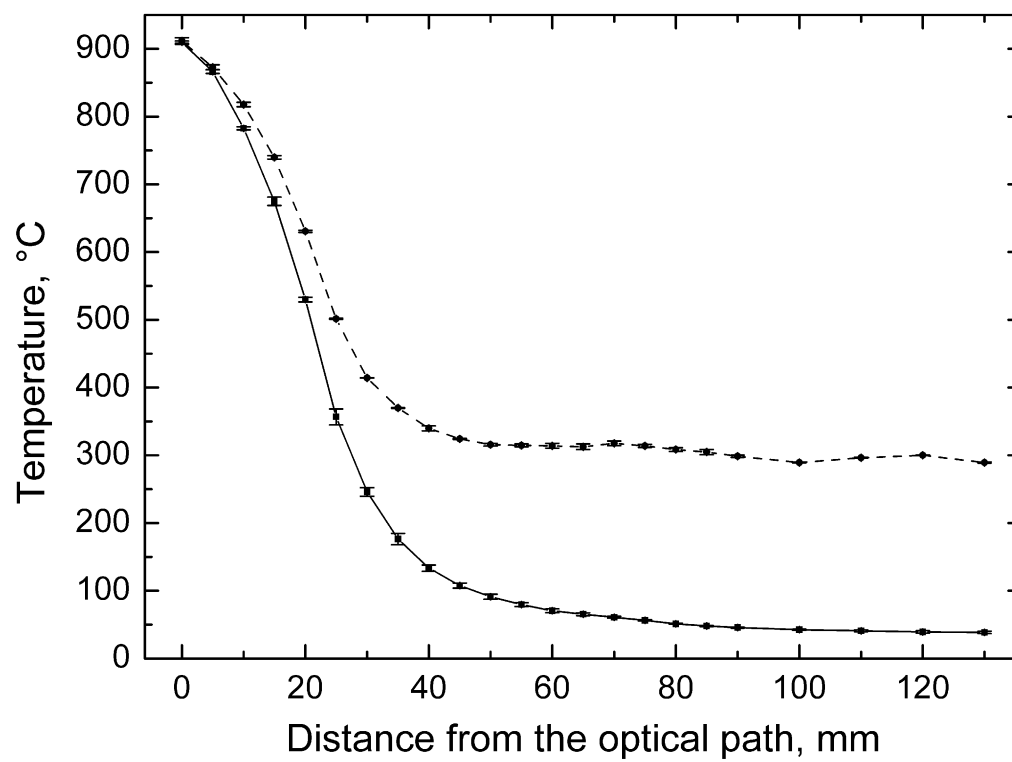

Supplement: c0ja00018c.pdf [file c0ja00018c.pdf]
